# Supplementary material for: Epidemiology characteristics of human coronaviruses in patients with respiratory infection symptoms and phylogenetic analysis of HCoV-OC43 during 2010-2015 in Guangzhou
Source: PLoS One. 2018 Jan 29;13(1):e0191789. doi: 10.1371/journal.pone.0191789 (PMC5788356; doi:10.1371/journal.pone.0191789)
Supplement: S1 Table — (DOC) [file pone.0191789.s002.doc]

**S1 Table. The Primers and probes used for Flu, RSV, PIV, ADV, HMPV, HRV and HBoV** **Screening**

| Virus | Primer/probe | Sequence（5’-3’） | Target Gene | PCR product (bp) |
| --- | --- | --- | --- | --- |
| Flu-A | FluA-F | GACCRATCCTGTCACCTCTGAC | M2 | 106 |
| FluA-R | AGGGCATTYTGGACAAAKCGTCTA |
| FluA-Probe | FAM-TGCAGTCCTCGCTCACTGGGCACG-TAMRA |
| Flu-B | FluB-F | TGCCTACCTGCTTTMMYTRACA | M | 75 |
| FluB-R | CCRAACCAACARTGTAATTTTTCTG |
| FluB-Probe | FAM-TGCTTTGCCTTCTCCA-TAMRA |
| RSV-A | RSVA-F | GCTCTTAGCAAAGTCAAGTTGAATGA | N | 82 |
| RSVA-R | TGCTCCGTTGGATGGTGTATT |
| RSVA-Probe | FAM-ACACTCAACAAAGATCAACTTCTGTCATCCAGC-TAMRA |
| RSV-B | RSVB-F | GATGGCTCTTAGCAAAGTCAAGTTAA | N | 104 |
| RSVB-R | TGTCAATATTATCTCCTGTACTACGTTGAA |
| RSVB-Probe | FAM-TGATACATTAAATAAGGATCAGCTGCTGTCATCCA-TAMRA |
| PIV First round | PIV13-F | AGGWTGYSMRGATATAGGRAARTCAT | HA | PIV1：439  PIV2：297  PIV3：390  PIV4：174 |
| PIV13-R | CTWGTATATATATRTAGATCTKTTRCCTAGT |
| PIV2-F | TAATTCCTCTTAAAATTGACAGTATCGA |
| PIV4-F | ATCCAGARRGACGTCACATCAACTCAT |
| PIV24-R | TRAGRCCMCCATAYAMRGGAAATA |
| PIV Nested PCR | PIV13-F | ACGACAAYAGGAARTCATGYTCT |
| PIV1-R | GACAACAATCTTTGGCCTATCAGATA |
| PIV3-R | GAGTTGACCATCCTYCTRTCTGAAAAC |
| PIV24-F | CYMAYGGRTGYAYTMGAATWCCATCATT |
| PIV2-R | GCTAGATCAGTTGTGGCATAATCT |
| PIV4-R | TGACTATRCTCGACYTTRAAATAAGG |
| ADV | ADV-F | GCCSCARTGGKCWTACATGCAC ATC | Hexon | 301 |
| ADV-R | CAGCACSCCICGRATGTCAAA |
| HMPV | hMPV-F | CATGCCCACTATAAAAGGTCAG | L | 171 |
| hMPV-R | CACCCCAGTCTTTCTTGAAA |
| HRV First round | RV-F1 | CTCCGGCCCCTGAATRYGGCTAA | 5’NCR |  |
| RV-R1 | TCIGGIARYTTCCASYACCAICC |
| HRV Nested PCR | RV-F2 | ACCRASTACTTTGGGTRWCCGTG | VP4/ VP2 | 110 |
| RV-R2 | CTGTGTTGAWACYTGAGCICCCA |
| HBoV | HBoV-F | AGAGGCTCGGGCTCATATCA | NP1 | 88 |
| HBoV-R | TCTTCATCACTTGGTCTGAGGTCT |
| HBoV-probe | FAM-AGGAACACCCAATCARCCACCTATCGT-TAMRA |

Flu: influenza virus; RSV: respiratory syncytial virus; PIV: parainfluenza virus; ADV: adenovirus; hMPV: human metapneumovirus; HRV: human rhinovirus; HBoV: human bocavirus.
